# Supplementary material for: Evidence that 6q25.1 variant rs6931104 confers susceptibility to chronic myeloid leukemia through RMND1 regulation
Source: PubMed Central journal article supplement (PMC6592567; doi:10.1371/journal.pone.0218968), 2019-06-25
Supplement: pone.0218968.s001.pdf [file pone.0218968.s001.pdf]

# Data supporting chr6:151786176 (rs6931104)

Score: 1f

Likely to affect binding and linked to expression of a gene target

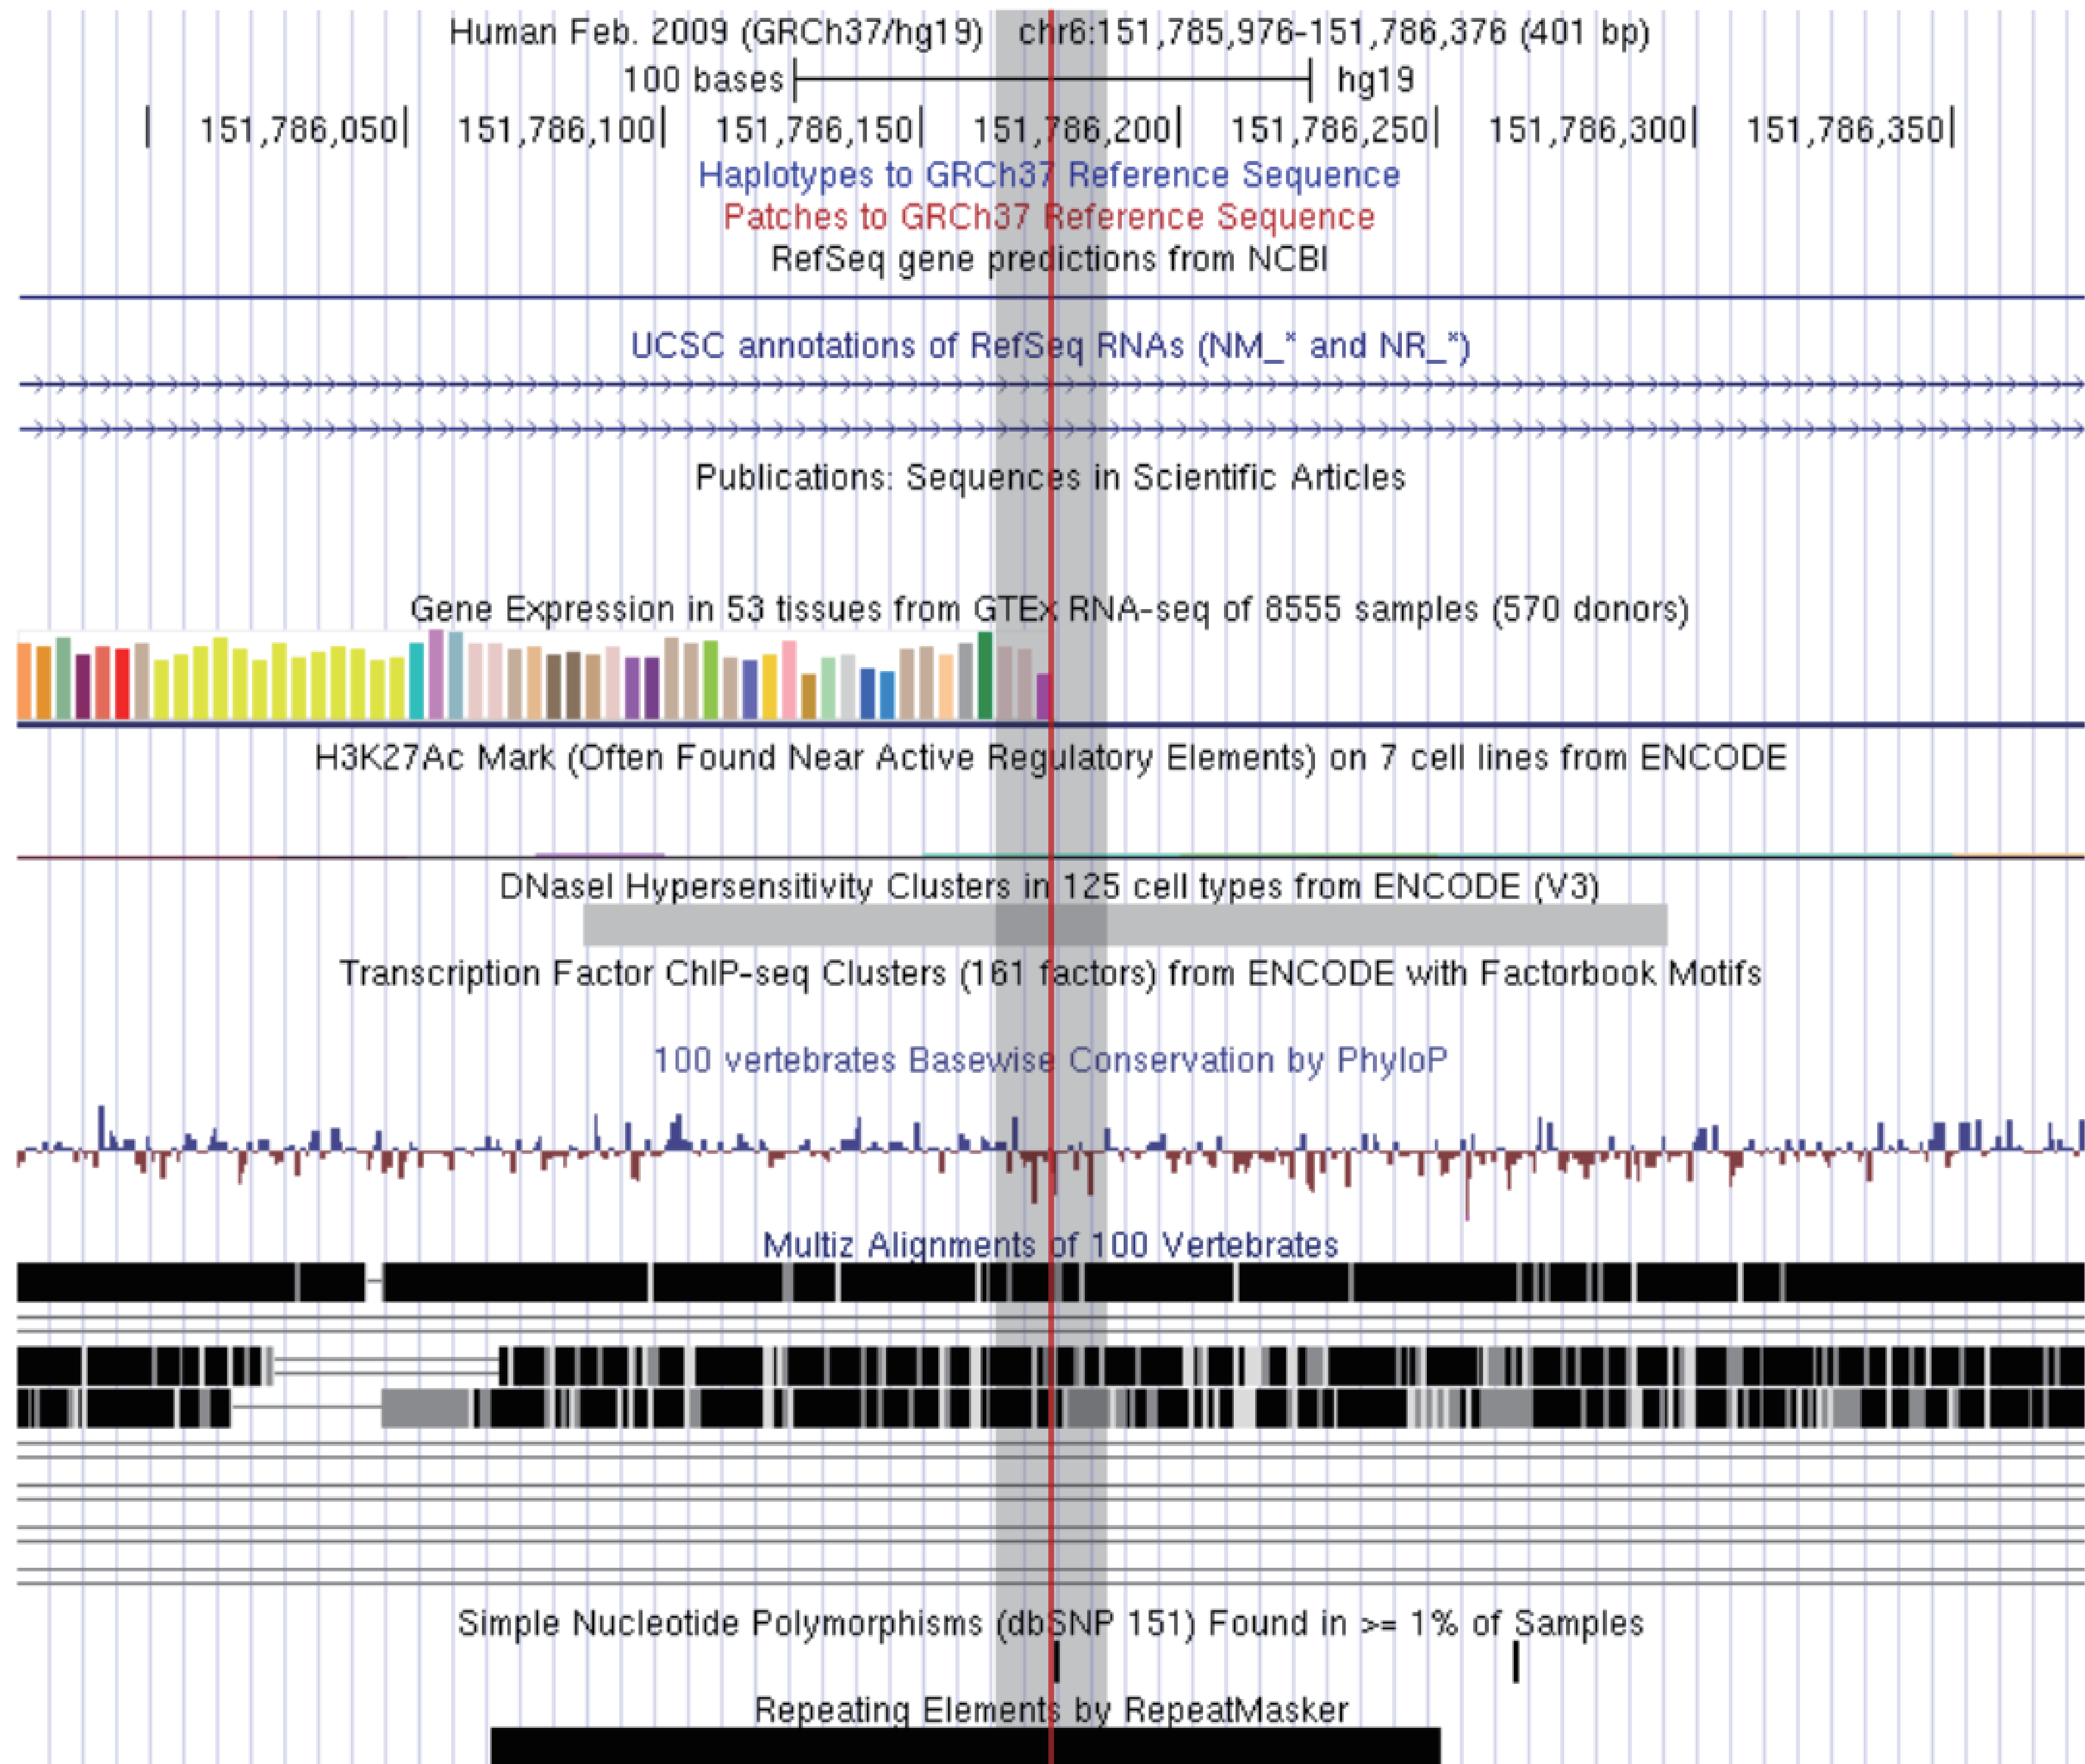

## Protein Binding

Filter:

| Method   | Location                  | Bound Protein | ? Cell Type | Additional Info | Reference |
|----------|---------------------------|---------------|-------------|-----------------|-----------|
| ChIP-seq | chr6:151786015..151786954 | RFX3          | K562        |                 | 20378718  |

## Single nucleotides

Filter:

| Method | Location                  | Affected Gene | ? Cell Type    | Additional Info | Reference |
|--------|---------------------------|---------------|----------------|-----------------|-----------|
| eQTL   | chr6:151786176..151786177 | RMND1         | Lymphoblastoid | cis             | 20220756  |
