# Supplementary material for: Evidence that 6q25.1 variant rs6931104 confers susceptibility to chronic myeloid leukemia through RMND1 regulation
Source: PubMed Central journal article supplement (PMC6592567; doi:10.1371/journal.pone.0218968), 2019-06-25

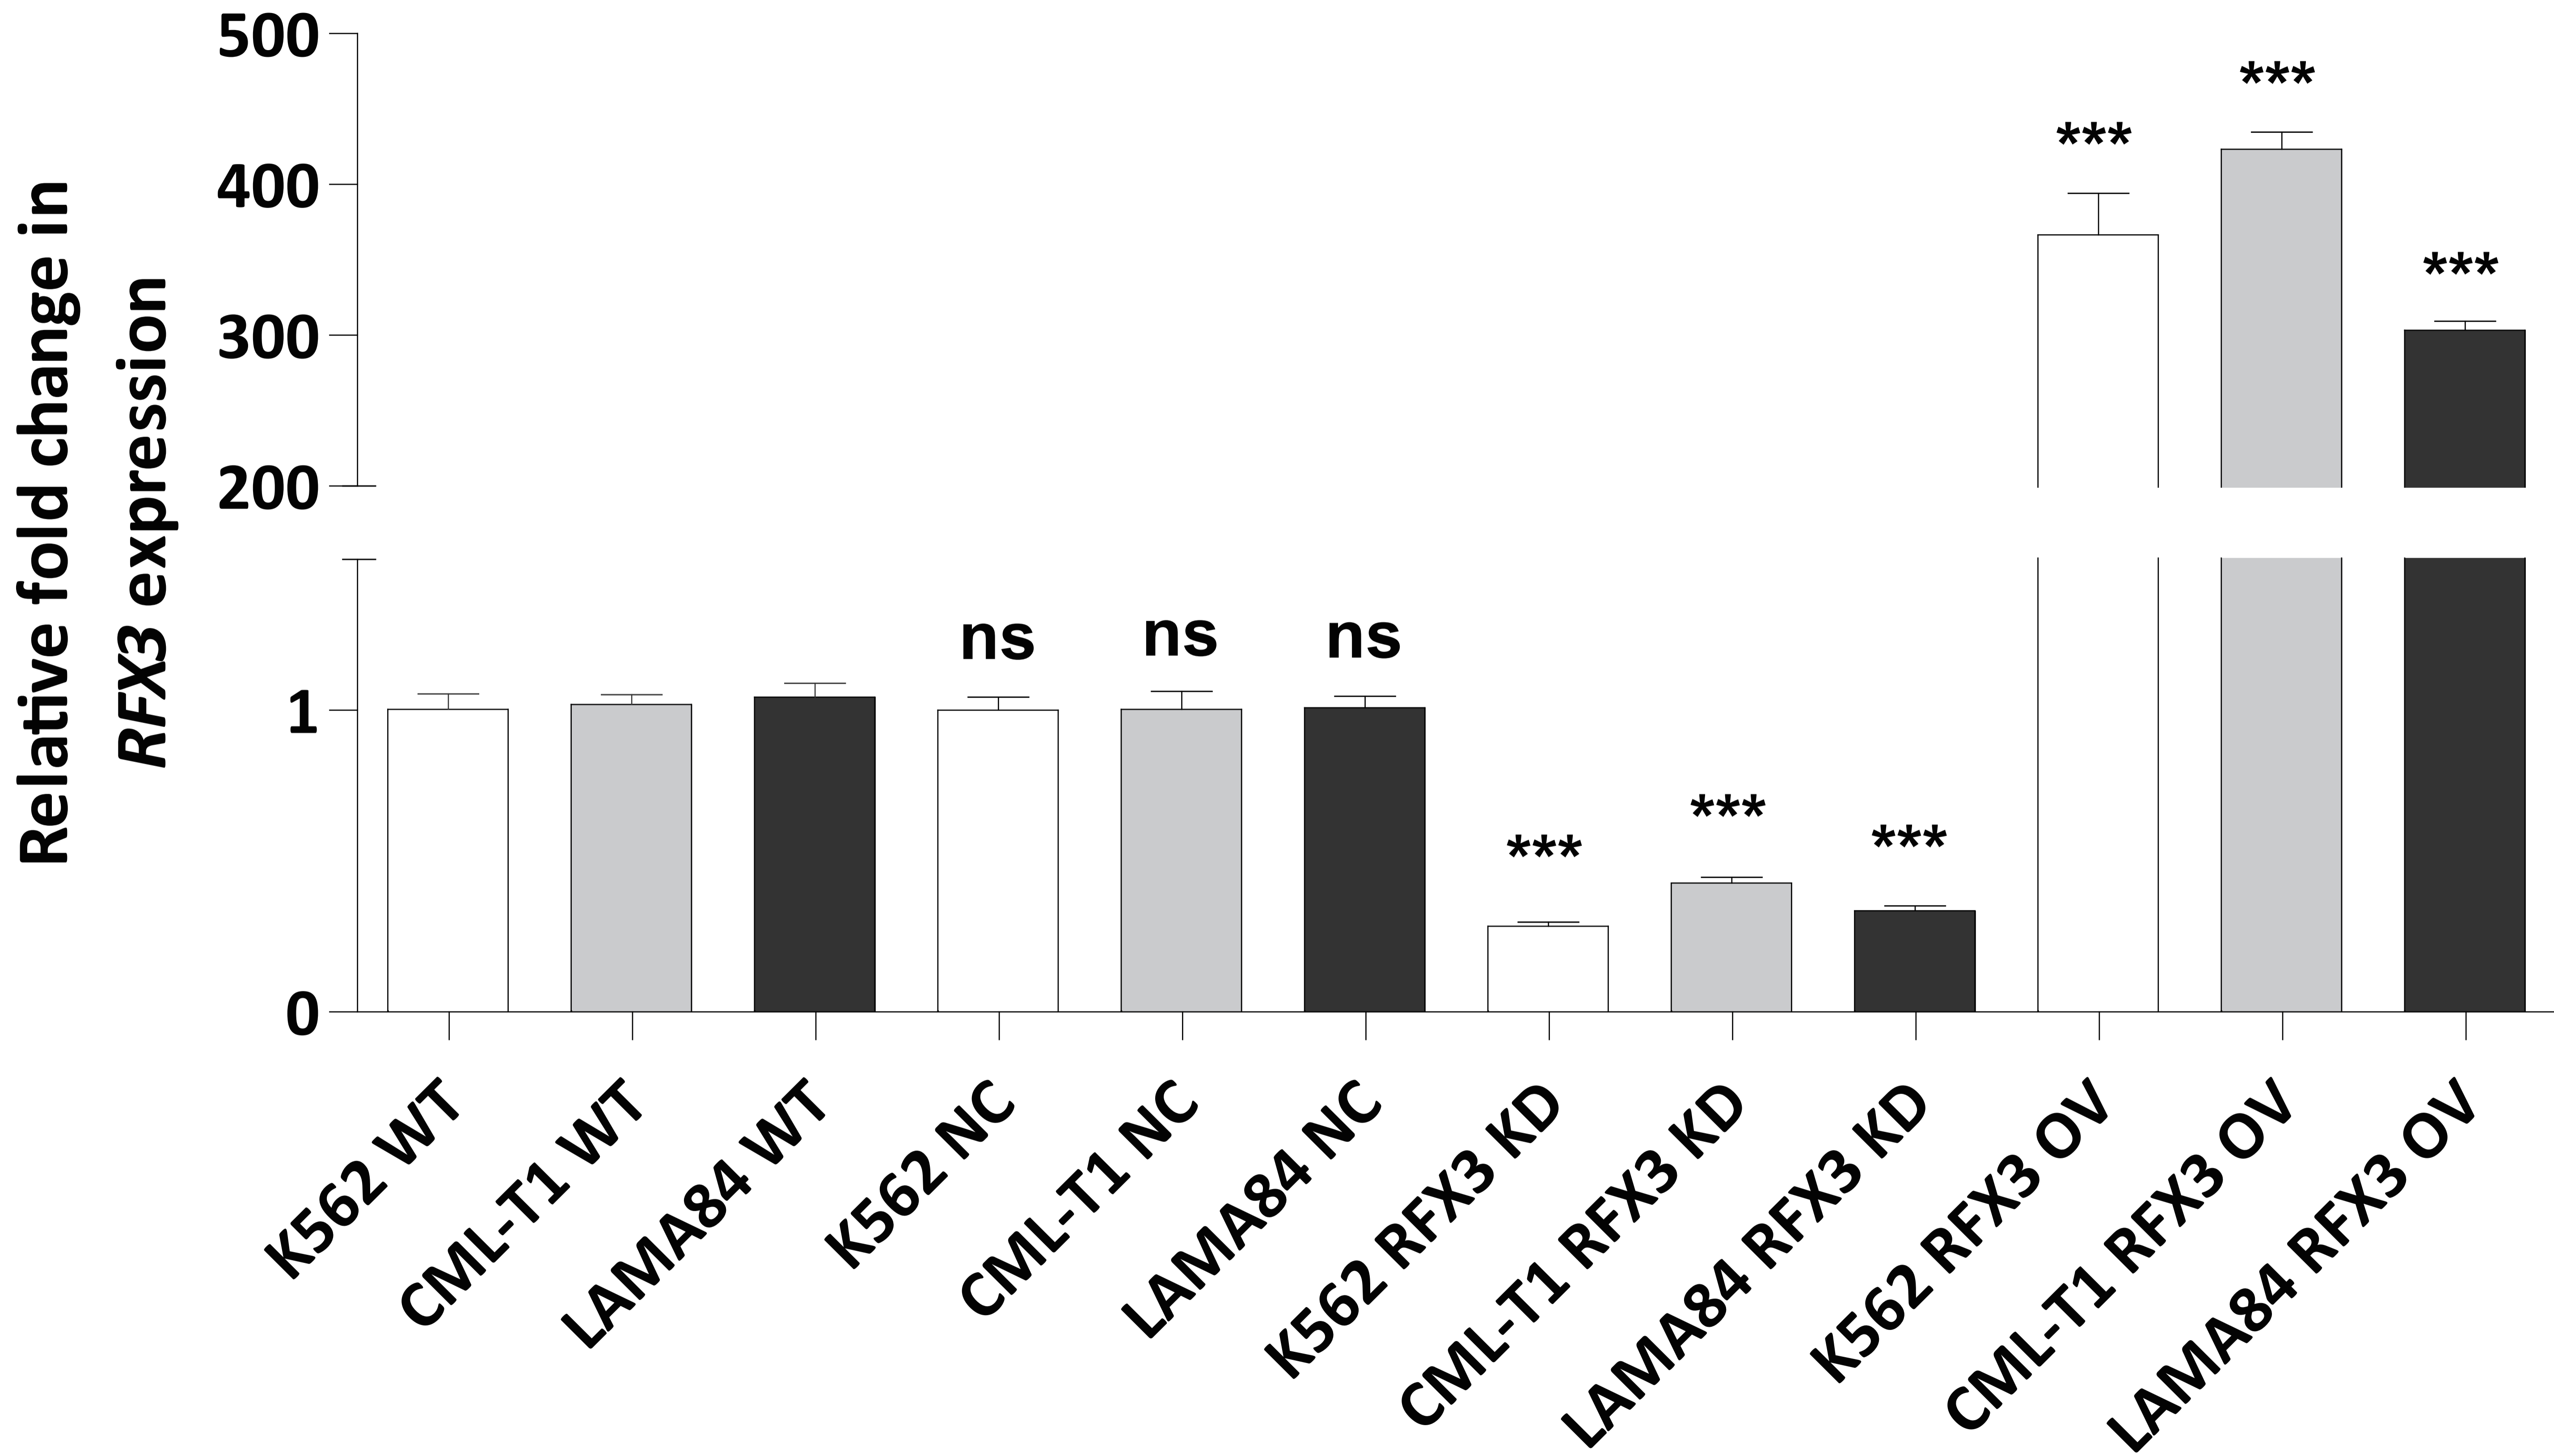

Supplement: pone.0218968.s002.pdf [file pone.0218968.s002.pdf]
